# Supplementary material
Source: publisher site journal article supplement (https://www.dovepress.com/article/265124)
Supplement: Supplementary file 1 [file get_supplementary_file.php]

Supplementary Table1. Consolidated criteria for reporting qualitative studies (COREQ)

| **Item** | **Guide questions/description** | **Reported on Page description** |
| --- | --- | --- |
| **Domain 1: Research team and reflexivity** | | |
| **Personal Characteristics** | | |
| 1. Interviewer/facilitator | Which author/s conducted the interview or focus group? | ES, MP/ Title Page |
| 1. Credentials | What were the researcher’s credentials? | ES and MP were BSc; MR was MD ; AA,SM, KT, FR were Ph.D / Title page |
| 1. Occupation | What was their occupation at the time of the study? | ES and MP graduated in BSc in public health; MR AA,SM, KT, FR were faculty member/ Title page |
| 1. Gender | Was the researcher male or female? | Three of them were male, and another was female (Page 6) |
| 1. Experience and training | What experience or training did the researcher have? | ES and MP conducted the interview. they trained in the qualitative research as part of their project during public health study. Other authors were expert in qualitative studies. (Page 6) |
| **Relationship with participants** | | |
| 1. Relationship established | Was a relationship established prior to study commencement? | No relationship with the participants was made before the commencement of the study. (Page 6) |
| 1. Participant knowledge of the interviewer | What did the participants know about the researcher? e.g. personal goals, reasons for doing the research | Participants knew the interviewers role and reasons for performing the research as these were disclosed during the informed consent process. (Page 6) |
| 1. Interviewer characteristics | What characteristics were reported about the interviewer/facilitator? e.g. Bias, assumptions, reasons and interests in the research topic | We disclosed researchers’ occupation, affiliation, reasons and interests to participants during the parent study. |
| **Domain 2: Study design** | | |
| **Theoretical framework** | | |
| 1. Methodological orientation and Theory | What methodological orientation was stated to underpin the study? e.g. grounded theory, discourse analysis, ethnography, phenomenology, content analysis | Hermeneutic phenomenology was used. (Page 7,8) |
| **Participant selection** | | |
| 1. Sampling | How were participants selected? e.g. purposive, convenience, consecutive, snowball | Purposeful sampling (Page 6). |
| 1. Method of approach | How were participants approached? e.g. face-to-face, telephone, mail, email | Face-to -face semi-structured in-depth interview was applied.  (Page 5). |
| 1. Sample size | How many participants were in the study? | 11 participants for the parent study (Page 9). |
| 1. Non-participation | How many people refused to participate or dropped out? Reasons? | From all 13 primary selected patients, two of them refused to participate in the study due to having no time to interview (Page 6). |
| **Setting** | | |
| 1. Setting of data collection | Where was the data collected? e.g. home, clinic, workplace | Data was collected in Imam Ali Cardiovascular hospital in a separated cardiovascular care room. (Page 6). |
| 1. Presence of non-participants | Was anyone else present besides the participants and researchers? | No. |
| 1. Description of sample | What are the important characteristics of the sample? e.g. demographic data, date | Of the 11 participants, most of them were married (2 women & 9 men) at the ages of 47 to 74 years old (mean 52±4.5;)., with the mean of 33.7±6.7 ejection fraction. Demographic data were provided in Table 1 |
| **Data collection** | | |
| 1. Interview guide | Were questions, prompts, guides provided by the authors? Was it pilot tested? | Questions were provided in the manuscript (Page 7). |
| 1. Repeat interviews | Were repeat interviews carried out? If yes, how many? | No |
| 1. Audio/visual recording | Did the research use audio or visual recording to collect the data? | Yes. All interviews were audiotaped. (Page 6) |
| 1. Field notes | Were field notes made during and/or after the interview or focus group? | No |
| 1. Duration | What was the duration of the interviews or focus group? | The duration of interviews was ranged from 30 to 45 Min, with an average of 37 minutes. (Page 6). |
| 1. Data saturation | Was data saturation discussed? | The interviews process continued until it was clear that no additional concepts or themes were emerging, which signified theoretical saturation ((Page 7). |
| 1. Transcripts returned | Were transcripts returned to participants for comment and/or correction? | Yes. The transcripts returned to participants to revision. We also held regular meetings to interview and consult the patients, asking them to read and check the subthemes and themes derived from the deliberations. (Page 7,8,9). |
| **Domain 3: analysis and findings** | | |
| **Data analysis** | | |
| 1. Number of data coders | How many data coders coded the data? | Four coders (Page 6) |
| 1. Description of the coding tree | Did authors provide a description of the coding tree? | Themes were provided in Table 2. |
| 1. Derivation of themes | Were themes identified in advance or derived from the data? | We used data-driven codes and themes were derived from the data (Page 8,9). |
| 1. Software | What software, if applicable, was used to manage the data? | MAXqda 10 (Page 7) |
| 1. Participant checking | Did participants provide feedback on the findings? | Yes, Also, additional contacts made between the story authors and patients over the subsequent four months enhanced the credibility of the statements.( Page 9) |
| **Reporting** | | |
| 1. Quotations presented | Were participant quotations presented to illustrate the themes / findings? Was each quotation identified? e.g. participant number | Yes. Quotations were available to illustrate the results. Each quotation was identified with each participant identifier throughout the result section. (page 6-8) |
| 1. Data and findings consistent | Was there consistency between the data presented and the findings? | Yes. There is a consistency between data and the results. |
| 1. Clarity of major themes | Were major themes clearly presented in the findings? | Yes. Major themes were presented in the Result section using subthemes (Table 2) |
| 1. Clarity of minor themes | Is there a description of diverse cases or discussion of minor themes? | Yes. Diverse cases and minor themes were illustrated under the major themes in the Result section and argued in the Discussion section. |
